# Supplementary material for: Acupuncture and Sleep Quality Among Patients With Parkinson Disease: A Randomized Clinical Trial
Source: PubMed Central journal article supplement (PMC11208974; doi:10.1001/jamanetworkopen.2024.17862), 2024-06-26
Supplement: jamanetwopen-e2417862-s001.pdf [file jamanetwopen-e2417862-s001.pdf]

1

2

3 **Acupuncture for Parkinson's disease patients with poor sleep quality:**

4 **A randomized, controlled trial**

5

6 The First Affiliated Hospital of Guangzhou University of Chinese Medicine,

7 Guangzhou University of Chinese Medicine

8

9

10

11 **Data:**

12 Original protocol date: Nov 08, 2021

13 Amendment date: Jan 18, 2022

14 **Clinical sites:**

15 The First Affiliated Hospital of Guangzhou University of Chinese Medicine

16 **Data Management and Statistical Centers:**

17 Guangzhou University of Chinese Medicine

18

## **Confidentiality Statement**

19 This document is the intellectual property of the Investigators. The information  
20 provided in this document is strictly confidential and is available for review to the  
21 sponsor, investigators, potential investigators, appropriate Ethics Committees,  
22 Investigational Review Boards, and other government regulatory bodies. No  
23 disclosure should take place without written authorization from the protocol  
24 developing investigators, except to the extent necessarily needed to obtain informed  
25 consent from potential patients.

26

27

## Table of Contents

|    |                                                      |    |
|----|------------------------------------------------------|----|
| 28 | <b>1. Study Contact and Organization</b> .....       | 4  |
| 29 | 1.1 Study Contacts .....                             | 4  |
| 30 | 1.2 Investigators .....                              | 4  |
| 31 | <b>2. Study Design</b> .....                         | 4  |
| 32 | 2.1 Study Overview .....                             | 4  |
| 33 | 2.2 Background .....                                 | 5  |
| 34 | 2.3 Study Objective .....                            | 5  |
| 35 | 2.4 Methodology .....                                | 6  |
| 36 | 2.4.1 Trial Design .....                             | 6  |
| 37 | 2.4.2 Patients .....                                 | 6  |
| 38 | 2.4.3 Trial Flow .....                               | 7  |
| 39 | 2.4.4 Randomization and Allocation Concealment ..... | 8  |
| 40 | 2.4.5 Blinding .....                                 | 9  |
| 41 | 2.4.6 Sample Size .....                              | 9  |
| 42 | <b>3. Interventions</b> .....                        | 9  |
| 43 | 3.1 Basic treatment .....                            | 9  |
| 44 | 3.2 Real Acupuncture (RA groups) .....               | 10 |
| 45 | 3.3 Sham Acupuncture (SA group) .....                | 10 |
| 46 | 3.4 the Auxiliary Acupuncture Device .....           | 11 |
| 47 | <b>4. Outcome Measurements</b> .....                 | 11 |
| 48 | 4.1 Primary Outcomes .....                           | 11 |
| 49 | 4.2 Secondary Outcomes .....                         | 12 |
| 50 | <b>5. Safety Assessment</b> .....                    | 13 |
| 51 | <b>6. Ethical Principle</b> .....                    | 14 |
| 52 | <b>7. Statistical Analysis</b> .....                 | 14 |
| 53 | <b>8. Some revisions</b> .....                       | 14 |
| 54 | <b>9. Funding</b> .....                              | 15 |
| 55 | <b>10. References</b> .....                          | 15 |
| 56 | <b>Appendix 1</b> .....                              | 17 |
| 57 |                                                      |    |
| 58 |                                                      |    |

## 59 **1. Study Contact and Organization**

### 60 **1.1 Study Contacts**

61 Principal Investigator for study,  
62 Professor Lixing Zhuang.  
63 The First Affiliated Hospital of Guangzhou University of Chinese Medicine, No. 16, Airport Rd,  
64 Baiyun District, Guangzhou 510000, Guangdong, China.  
65 Email: zhuanglixing@163.com

### 66 **1.2 Investigators**

67 Lixing Zhuang, Professor, supervisor of acupuncture scheme  
68 Ming-yue Yan, PhD, Management and Implementation of experiment, Designer of acupuncture scheme  
69 Jingqi Fan, PhD, Designer and supervisor of acupuncture scheme  
70 Xin-Liu, PhD, Design and manufacture of sham needle, supervisor of acupuncture scheme  
71 Yu-ting Wang, PhD, Design and manufacture of sham needle, Data analysis  
72 Wei-qiang Tan, MM, Implementation of experiment  
73 Weijing Lu , MM, Implementation of experiment  
74 Yuan-yuan Chen, MM, Implementation of experiment  
75 Qing-Liu, MM, Implementation of experiment  
76 Xiaoyan Xu, Implementation of experiment  
77 Ian-I Leong, MM, Outcome evaluation and data collection  
78 Ying-jia Li, MM, Outcome evaluation and data collection  
79 Jun-He, PhD, Professor, supervisor of acupuncture scheme

## 80 **2. Study Design**

### 81 **2.1 Study Overview**

82 This randomized controlled trial was conducted to assess the safety and efficacy of real acupuncture  
83 versus sham acupuncture as adjunctive therapy for PD patients with poor sleep quality. We  
84 hypothesized that real acupuncture(RA) combined with anti-parkinson medication would be an  
85 effective treatment for sleep and sleep-related symptoms of PD patients. This trial has been registered  
86 at Chinese Clinical Trial Registry (CHICTR2200060655).

## 87 2.2 Background

88 With the increase in the percentage of aged people in the global population, the incidence of  
89 Parkinson's disease (PD) is also increasing. Parkinson's disease(PD) is characterized by four primary  
90 motor symptoms: Bradykinesia, Muscular rigidity,4–6 Hz rest tremor and Postural instability<sup>1</sup>. As the  
91 disease advances, non-motor symptoms (NMS) of Parkinson's disease can predominate and are  
92 associated with reduced health-related quality of life(HRQoL)<sup>2-4</sup>. PD patients, experiencing poor sleep  
93 quality and quantity, typically come to hospitals with sleep complaints and more severe motor  
94 conditions. Researches have shown that poor sleep in PD is linked to a more rapid deterioration in gait  
95 and dyskinesia<sup>5-7</sup>.In other words, poor sleep is associated with a more severe PD clinical phenotype.  
96 Besides, mental state and movement medications can aggravate sleep concerns<sup>8,9</sup>. Additionally,  
97 subjective sleep quality can affect health-related quality of life in PD patients<sup>10,11</sup>. Therefore, paying  
98 much more attention to the management of sleep quality could be beneficial to addressing NMS, motor  
99 symptoms, and HRQoL in PD patients.

100 The health-related quality of life(HRQoL) in PD patients can be significantly affected by sleep  
101 disturbances. Current management options remain limited, primarily consisting of drug treatment, and  
102 non-drug treatment. After evaluating the cause and the subtype of sleep disorders(SDs), the first choice  
103 is to optimize dopaminergic therapy if the SD is related to nocturnal motor symptoms<sup>12</sup>. Drugs like  
104 benzodiazepines, sedative antidepressants and antipsychotics are beneficial while they are frequently  
105 accompanied by side effects such as morning sedation, imbalance, or confusion<sup>13</sup>. Non-drug treatments,  
106 such as cognitive-behavioral therapy, acupuncture, light treatment, repetitive transcranial magnetic  
107 stimulation, and exercise, provide insufficient evidence on their safety and efficacy<sup>12</sup>. Further studies  
108 should focus on novel approaches with the goal of applying safe and effective therapies to alleviate  
109 sleep symptoms, motor symptoms and improve quality of life in PD patients.

110 There is limited evidence of Non-drug treatments in the treatment of constipation in PD. Safe and  
111 effective complementary treatments for the motor and sleep symptoms of Parkinson's disease are  
112 required.

113 Acupuncture is a safe adjunctive therapy that has been used for the treatment of PD diseases and has  
114 shown positive effects in reducing motor symptoms and non-motor symptoms in PD patients<sup>14-16</sup>.  
115 However, there is still insufficient high-quality clinical evidence to support its effectiveness due to  
116 small sample sizes, unclear reporting and potential bias<sup>17</sup>. We hypothesized that Acupuncture plus  
117 conventional treatment would be an effective treatment for PD patients with poor sleep quality  
118 compared with sham acupuncture. Therefore, we design this study to investigate the efficacy of  
119 Acupuncture for treating PD with poor sleep quality. The trial not only compared the effectiveness of  
120 real acupuncture (RA) versus sham acupuncture (SA) but also provided a comprehensive evaluation of  
121 the relief of sleep quality, anxiety level, NMS, motor symptoms, and HRQoL in PD patients  
122 experiencing comorbid insomnia and motor symptoms.

## 123 2.3 Study Objective

124 To assess the safety and efficacy of real acupuncture versus sham acupuncture as adjunctive therapy for

125 PD patients with poor sleep quality.

## 126 **2.4 Methodology**

### 127 **2.4.1 Trial Design**

128 This was a single-center, randomized, controlled clinical trial with blinded participants, outcome  
129 assessment, and statistician in China. This study received approval from the Ethics committee of the  
130 First Affiliated Hospital of Guangzhou University of Chinese Medicine (Approval No. K [2021]104),  
131 and written informed consent was obtained from all participants. This trial was registered with Chinese  
132 Clinical Trial Registry (ChiCTR2200060655). This study followed the Consolidated Standards of  
133 Reporting Trials (CONSORT) reporting guideline.

### 134 **2.4.2 Patients**

#### 135 2.4.2.1 Patients Recruitment, Screening

136 The participants will be recruited from the Parkinson clinic of the First Affiliated Hospital of  
137 Guangzhou University of Chinese Medicine. Interested participants can contact the researchers through  
138 the provided telephone numbers or WeChat code. An independent researcher will conduct face-to-face  
139 interviews with the participants to explain the study, and those who volunteer to participate will be  
140 required to sign consent forms (Appendix 1). After a baseline screening visit, participants who meet the  
141 inclusion criteria will be able to participate in the study.

#### 142 2.4.2.2 Inclusion Criteria

143 (1) patients diagnosed with idiopathic Parkinson's disease according to the MDS clinical diagnostic  
144 criteria for Parkinson's disease published in 2015<sup>18</sup>.

145 (2) self-reported moderate or severe sleep problems or a Parkinson's Disease Sleep Scale (PDSS) score  
146 between [0,100].

147 (3) aged 30 to 80 years old.

148 (4) stages 1 to 3 of Hoehn and Yahr(H&Y) scale.

149 (5) acceptance of acupuncture therapy.

150 (6) stable use of anti-Parkinson medication for 30 days.

151 (7) understanding of the protocol and signing the informed consent form.

#### 152 2.4.2.3 Exclusion Criteria

153 (1) patients who did not meet any of the above criteria.

154 (2) patients unable to cooperate normally due to severe cognitive dysfunction, blindness, deafness, etc.

155 (3) comorbid with some other serious systemic diseases such as stroke, malignancy, renal failure,  
156 diabetes mellitus, atrial fibrillation, and so on.

157 (4) irregular use of sleep-assisted medication.

158 (5) received acupuncture treatment within the last 30 days.

159 (6) drug or alcohol abuse history.

160 (7) pregnancy or lactation.

161 **2.4.3 Trial Flow**

162 2.4.3.1 Screening Visit

163 Patients will be screened according to inclusion and exclusion criteria, eligible patients will be required  
164 to provide written informed consent and enter the baseline visit. Randomization will be performed  
165 before baseline assessment (2.4.4).

166 2.4.3.2 Baseline Visit

167 Researchers give participants sleep hygiene education, tell them keep the initial anti-parkinson  
168 medication and assess their demographic, clinical characteristics and observation scales.

169 2.4.3.3 Acupuncture treatment

170 Treatment will begin after baseline assessment. The two groups' participants will receive treatment for  
171 4 weeks, three times per week (every Monday, Wednesday, Friday). Check for adverse events and  
172 concurrent drugs.

173 2.4.3.4 Aftertreatment Visit

174 After 12 times treatment, evaluators assessed and recorded scale outcomes, UPDRS scale, Hoehn-Yahr  
175 scale, PDSS scale, ESS scale, and PDQ39 scale. Adverse events are also assessed and recorded.

176 2.4.3.5 Follow-up and Endpoint

177 The follow-up visits will be arranged for 4 weeks after the end of treatment. Patients will receive a final  
178 assessment of scales , adverse events and concomitant medications at the week 8.

179 2.4.3.6 Patient Withdrawals

180 Patients may leave the study at their own discretion, and the investigator may determine if the patients  
181 withdraw from the trial due to violation of the trial protocol or the occurrence of a serious adverse  
182 event. Figure1 shows the flow diagram of the trial.

183

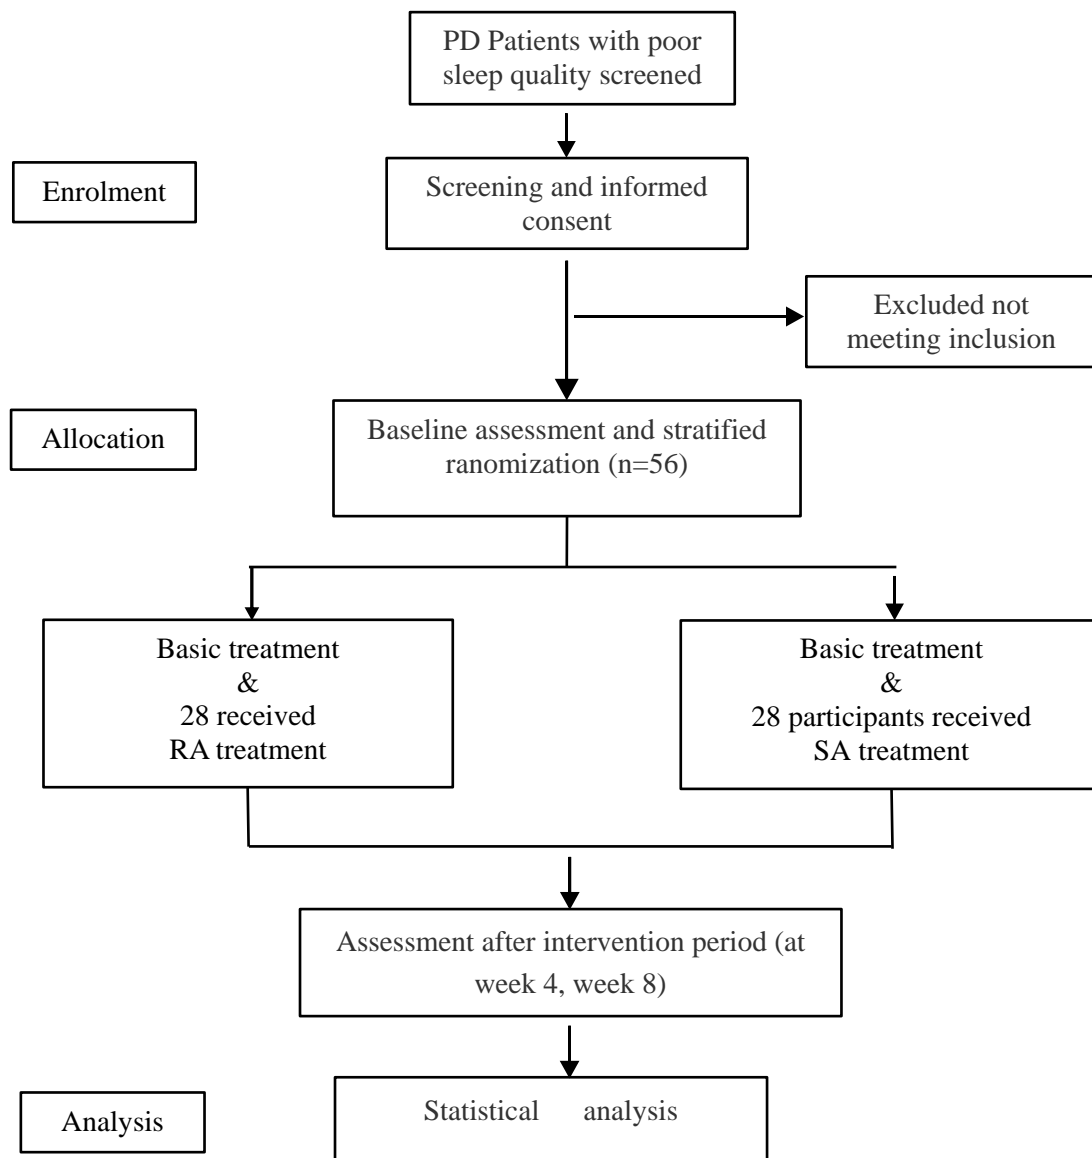

Figure 1 Flow chart

184  
185

186 **2.4.4 Randomization and Allocation Concealment**

187 Patients were randomly assigned at random (1:1) to either the SA group or the RA group. A  
 188 randomized sequence was generated using SPSS Statistics 26.0 (IBM SPSS Inc, Chicago, USA), the  
 189 allocation sequence was hidden from the investigators, the allocation sequence was contained in  
 190 sequentially numbered sealed opaque envelopes and managed by a third party (not the investigators).  
 191 When a participant met the inclusion criteria, the clinical research coordinator contact with the third  
 192 party to get his random number and group assignment. The acupuncturist will give the corresponding  
 193 intervention to the subject.



194 **2.4.5 Blinding**

195 This clinical trial blinded participants, outcome assessment, and statisticians in order to prevent bias.  
196 Due to the nature of acupuncture and the necessity of this study, the acupuncturists were not blinded to  
197 the treatment allocation. And we design an equipment to assist in blinding participants. Acupuncturists  
198 were instructed not to disclose the patient's group assignment to patients and data collectors at any  
199 time.

200 **2.4.6 Sample Size**

201 The purpose of our study was to compare the improvement of sleep quality in PD patients between the  
202 SA groups and the RA group. Sample size was based on the pre-experiment PDSS score, with  
203 mean(SD) PDSS score s of 122.27 (15.35) for acupuncture and 100.4 (21.4) for sham acupuncture  
204 subjects. To achieve 90% power at a two-side significance of  $p < 0.05$  , a sample size of 44 subjects (22  
205 per group) was calculated. Considering a 20% dropout the sample size was 56 patients calculated by  
206 PASS software (version 15.0.5).

207 **3. Interventions**

208 **3.1 Basic treatment**

- 209 ● **Anti-Parkinson medication** Due to the complexity of the clinical presentation symptoms of PD  
210 and the principle of personalized treatment in PD clinical guidelines, PD treatment was strictly  
211 conducted in this trial. Madopa is the major medicine utilized in the treatment of PD patients.  
212 However, the application of these medication can affect patient's motor and non-motor symptoms,  
213 including sleep disorders. So we request if the subjects is taking dopaminergic medication  
214 regularly before enrollment, they can continue to take an effective dose medication but the dose  
215 cannot be modified at will. To solve this issue, the dosages of the different drugs will be  
216 converted to a total daily levodopa equivalent dose (LED) and recorded by data assessors.<sup>[17]</sup>  
217
- 218 ● **Sleep hygiene education** Based on the sleep symptoms of the patient, regular sleep hygiene  
219 education was provided to patients to help them develop correct perceptions and establish proper  
220 sleep habits. Patients enrolled in the trial had opportunity to discuss their specific sleep problems  
221 with researchers in a 30-60 minutes face-to-face evaluation. Researchers introduced sleep  
222 relaxation techniques and recommended them books related with sleep hygiene. After that,  
223 researchers are requested to contact participants every 2 weeks to follow and address subjects'  
224 sleep questions.  
225

226

227 **3.2 Real Acupuncture (RA groups)**

228 ● **Duration** The RA group received thirty-minute sessions of treatment three times each week for  
229 four weeks, for a total of 12 sessions.

230 ● **Acupoints** The bilateral connection of Si Shenzen, ShenTing(GV24), YinTang(GV29),  
231 HeGu(LI4), TaiChong(LR3), SanYinJiao(SP6), ShenMen(HT7), ZuSanLi(ST36),  
232 ShenMai(BL62), ZhaoHai(KI6). The acupoint names and locations adhered to the National  
233 Standard of the People's Republic of China: Nomenclature and location of meridian points (GB/T  
234 12346–2021), established in 2021. All treatments were performed by senior acupuncturists ( $\geq 2$   
235 years of service), who used the same standardized equipment.

236 ● **Procedure** Patients lay flat on the treatment bed and wore opaque eye masks. After confirming  
237 the acupuncture points, doctors firstly pressed the needle holder tightly to the skin of the  
238 acupoints and then performed acupuncture, inserting sterile needles into the corresponding  $15^\circ/90^\circ$   
239 needle entry portals on the needle holders. This procedure lasted 30 minutes and then doctors took  
240 out needles and needle holders and gently pressed needle holes with a sterilized dry cotton swab.

241 ● **Equipments** Sterile acupuncture needles ( $\Phi 0.30\text{mm}\times 25\text{mm}$  or  $\Phi 0.30\text{mm}\times 40\text{mm}$ , Tianxie,  
242 Suzhou Medical Appliance Factory, China, depending on different patient's body), a new  
243 auxiliary acupuncture device for RA group (shown in figure2,figure 3 )

244 ● **Technique** Different acupoints require different approaches for inserting needles because of  
245 different muscle distribution: shallower parts require flat stabbing, with the needle tip and skin at  
246 an angle of  $15^\circ$ , richer parts require straight stabbing into the tissue, with the needle tip and skin  
247 at an angle of  $90^\circ$ . All four Sishenzhen points and Shenting point were oriented toward the top of  
248 the head, the orientation of Yintang were downward. All these acupoints on the head was entered  
249 flatly for 15~20 mm. The points of shenmen should be stimulated straightly for 12-20 mm but the  
250 superficial veins should be avoided. The needle was stimulated straightly for 20-30 mm in  
251 Sanyinjiao and Zusanli point, and slightly downward diagonal stabbing for 10-15mm in Shenmai  
252 and Zhaohai. Deqi (a sensation of aching, soreness, swelling, heaviness, or numbness) was then  
253 obtained by manipulation.

254 **3.3 Sham Acupuncture (SA group)**

255 The SA group applied the same intervention duration, acupoints and procedure with the RA group, but  
256 different acupuncture equipment.

257 ● **Equipment** Blunt sterile acupuncture needles ( $\Phi 0.30\text{mm}\times 25\text{mm}$  or  $\Phi 0.30\text{mm}\times 40\text{mm}$ , Tianxie,  
258 Suzhou Medical Appliance Factory, China, depending on different patient's body), a new  
259 auxiliary acupuncture device for SA group. (shown in figure2,figure 3 )

260 ● **Technique** the orientation and angle were the same as the RA group. Patients may feel a pinprick  
261 sensation but the blunt needle didn't penetrate the skin into the subcutaneous tissue.

262 **3.4 the Auxiliary Acupuncture Device**

263 Our team designed an auxiliary device for sham acupuncture research, allowing for blinding patients  
264 effectively. This device for real and sham acupuncture share the same appearance, both are composed  
265 of a hemispherical base and a telescopic tube. The insertion angle of needles can be adjusted from 15°  
266 to 165° by rotating the telescopic tube in the notch of the base. The bottom of the base is attached with  
267 hydrogel, which has good fixity. The auxiliary device is applicable to multiple parts of the human body  
268 and can effectively reduce the risk of unblinding. The acupuncturists adopts a tube-needle approach to  
269 insert needle, tapping the inner tube's tip quickly with the finger before inserting the needle downward.  
270 the tip of the needle pierced the hemispherical silicone needle cushion inside the SA group, and the  
271 needle tip pierced the human skin inside the RA group.

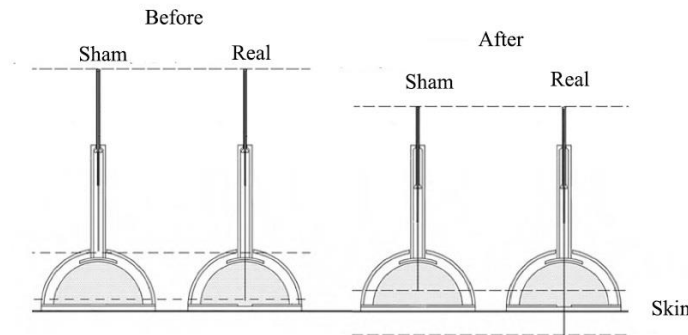

272  
273

Figure2 the Schematic Diagram of Auxiliary Acupuncture Device

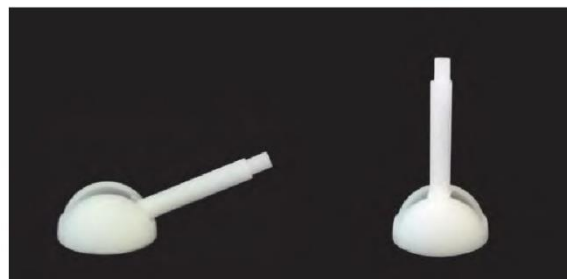

274  
275

Figure 3 the Auxiliary Acupuncture Device

276 **4. Outcome Measurements**

277 **4.1 Primary Outcomes**

278 Our primary outcome was the was change from baseline on the Parkinson's Disease Sleep Scale (PDSS)  
279 assessed 3 times at week 0, week 4 and week 8, before, after treatment and follow-up. The PDSS is a  
280 15-item self-report scale that gauge the impact of poor sleep quality on various functions, evaluating 8  
281 aspects of nocturnal sleep in PDSS. These aspects include the overall quality of a night's sleep,

282 insomnia, nocturnal restless, nocturnal psychosis , nocturia, nocturnal motor symptoms, sleep  
283 refreshment, and daytime dozing. The assessed period is “the past 1 week”, with patients marking their  
284 response to each item on a visual analogical scale ranging from “always” (0) to “never”(10). The total  
285 PDSS score ranges from 0 to 150. And scale score increases as their quality of sleep improves.

#### 286 **4.2 Secondary Outcomes**

287 The secondary outcomes included the completion rate, adverse events, and assessment of participants  
288 with the following protocol: (1) the severity of motor symptoms were quantified by modified  
289 Hoehn-Yahr Scale and the Unified Parkinson's Disease Rating Scale(UPDRS, UPDRS-III),daily  
290 levodopa equivalent dose(LED).(2) the overall severity of motor symptoms was assessed by  
291 Non-Motor Symptoms Scale (NMSS). Specifically, excessive daytime sleepiness was assessed by  
292 Epworth Sleepiness Scale (ESS), anxiety levels were assessed by the Hamilton Anxiety Rating Scale  
293 (HAMA). (3) Quality of life (QOL) was assessed by the 39-item Parkinson Disease Questionnaire  
294 (PDQ-39). Key secondary outcomes were also assessed 3 times at week 0, 4 and 8.

295 **The research process and data collection are described in detail in Table 1.**

296

Table 1 Schedule of enrolment, interventions, and assessments

| Study period          |                                  | Intervention period |        | Follow-up period |   |
|-----------------------|----------------------------------|---------------------|--------|------------------|---|
| Time point            |                                  | week 0              | Week 4 | Week8            |   |
| Eligibility screening |                                  | ×                   |        |                  |   |
| Informed consent      |                                  | ×                   |        |                  |   |
| Randomization         |                                  | ×                   |        |                  |   |
| Primary outcome       | PDSS                             | ×                   | ×      | ×                |   |
| Secondary outcomes    | Assessment of motor symptoms     | UPDRS               | ×      | ×                | × |
|                       |                                  | UPDRS-III           | ×      | ×                | × |
|                       |                                  | LED                 | ×      | ×                | × |
|                       | Assessment of non-motor symptoms | NMSS                | ×      | ×                | × |
|                       |                                  | ESS                 | ×      | ×                | × |
|                       |                                  | HAMA                | ×      | ×                | × |
|                       | Quality of life                  | PDQ-39              | ×      | ×                | × |
|                       |                                  |                     | ×      | ×                | × |
|                       | AEs                              |                     | ×      | ×                |   |
| Compliance evaluation |                                  |                     | ×      | ×                |   |

299 Abbreviations: PD, Parkinson's disease; PDSS, Parkinson's Disease Sleep Scale; ESS, Epworth  
300 Sleepiness Scale; UPDRS, the Unified Parkinson's Disease Rating Scale; UPDRS-III, the section 3 of  
301 the Unified Parkinson's Disease Rating Scale; NMSS, the Non-Motor Symptoms Scale; HAMA, the  
302 Hamilton Anxiety Rating Scale; PDQ-39, 39-item Parkinson Disease Questionnaire.

### 303 5. Safety Assessment

304 AE is defined as feeling unwell during the trial related to treatment of PD or acupuncture treatment.  
305 Throughout all the treatment visits and the follow-up visits, we monitored the treatment-induced  
306 adverse events, recording adverse events such as needle sickness, needle breakage, hematoma,  
307 infection, etc. All patients will directly report any adverse event (mild, moderate, or severe) to the  
308 acupuncturists. Common AEs related to acupuncture include fainting, local ecchymoses, continuous  
309 pain, acupoint location infection and dizziness, while AEs related to PD treatment include severe

310 tremor, nausea, vomiting, hypotension. A serious adverse event was defined as any adverse event  
311 posing a threat to a patient's life or functioning. The severity of adverse events (mild, moderate, or  
312 severe) was assessed by the investigators. We ask patients in both groups to call acupuncturists to  
313 report any discomfort during the trial, and the acupuncturists need to ask in detail and determine their  
314 relevance to treatment. Acupuncturists should evaluate the patient's condition to decide whether the  
315 treatment can be continued if they happen. The results of AEs will be described as the number and  
316 proportion (%) of AEs.

## 317 **6. Ethical Principle**

318 This study protocol has been approved by ethics committees of the First Affiliated Hospital of  
319 Guangzhou University of Chinese Medicine (Approval No. K [2021]104). This study conforms to the  
320 Declaration of Helsinki principles. Patient enrollment won't start until the Institution Review Board  
321 (IRB) approves the trial protocol, but everything should happen following registration.

## 322 **7. Statistical Analysis**

323 Shapiro-Wilk normality analysis was applied at baseline, with results conveyed as mean (SD) and the  
324 t-test for normal distributions, or as Median (%) and the Mann-Whitney U test for non-normal  
325 distributions. Group differences in trial outcomes were assessed using a linear model for continuous  
326 variables. Key estimates and standard errors of therapeutic assessment between groups were obtained  
327 through the PROC MIXED data procedure in SAS statistical software, version 9.4. Specifically, a  
328 mixed-effects model was employed to evaluate the primary outcome of PDSS, as well as secondary  
329 outcomes including ESS, UPDRS, UPDRS-III, NMSS, HAMA, and PDQ-39, considering the  
330 interaction effects between time and group.

331 Missing data were addressed using multiple imputations with the Markov chain Monte Carlo method.  
332 Efficacy was assessed in full analysis set, which included all randomized patients who received at least  
333 one week of acupuncture. Continuous variables were presented as least-squares means with 95%  
334 confidence intervals(CI). It is essential to note that the 95% CI were not adjusted for multiple  
335 comparisons and should not be utilized to infer definitive treatment effects. A two-sided P value of less  
336 than 0.05 was considered to indicate statistical significance for the primary outcome. All analyses were  
337 performed using SAS software (version 9.4; SAS Institute Inc. Cary, NC).

338

## 339 **8. Some revisions**

340 We have made certain changes to the initial trial protocol to properly conduct this trial and reflect the  
341 effectiveness of acupuncture from a wider range of perspectives. Compared with the original plan, we

342 have reduced the frequency of intervention from 4 times a week to 3 times a week, to avoid the traffic  
343 and time burden caused by commuting to and from the hospital. We used PDQ-39 instead of SF-36 to  
344 evaluate the patient health-related quality of life, because PDQ-39 is more targeted in Parkinson  
345 patients. In order to provide comprehensive results, we added some scales as secondary outcomes:  
346 UPDRS to evaluate the severity of motor symptoms, HAMA to evaluate the anxiety level, NMSS to  
347 evaluate the overall severity of non-motor symptoms. The Rapid-eye-movement Sleep Behavior  
348 Disorder Screening Questionnaire (RBDSQ) was eliminated because there were insufficient data to  
349 determine its statistical efficacy. We ultimately gave up on serological testing because of issues with  
350 reagent transportation and storage as well as patient compliance.

## 351 **9. Funding**

352 This work was supported by the National Natural Science Foundation of China (Grant Number.  
353 82174486).

354  
355

## 356 **10. References**

- 357 1.Kalia LV, Lang AE. Parkinson's disease. *Lancet*. 2015;386(9996):896-912.
- 358 2.Heimrich KG, Schöenberg A, Santos-García D, Mir P, Coppadis Study G, Prell T. The Impact of  
359 Nonmotor Symptoms on Health-Related Quality of Life in Parkinson's Disease: A Network Analysis  
360 Approach. *J Clin Med*. 2023;12(7).
- 361 3.Martinez-Martin P. Nonmotor symptoms and health-related quality of life in early Parkinson's  
362 disease. *Mov Disord*. 2014;29(2):166-168.
- 363 4.Marinus J, Zhu K, Marras C, Aarsland D, van Hilten JJ. Risk factors for non-motor symptoms in  
364 Parkinson's disease. *Lancet Neurol*. 2018;17(6):559-568.
- 365 5.O'Dowd S, Galna B, Morris R, et al. Poor Sleep Quality and Progression of Gait Impairment in an  
366 Incident Parkinson's Disease Cohort. *J Parkinsons Dis*. 2017;7(3):465-470.
- 367 6.de Almeida FO, Ugrinowitsch C, Brito LC, et al. Poor sleep quality is associated with cognitive,  
368 mobility, and anxiety disability that underlie freezing of gait in Parkinson's disease. *Gait Posture*.  
369 2021;85:157-163.
- 370 7.Mao CJ, Yang YP, Chen JP, et al. Poor nighttime sleep is positively associated with dyskinesia in  
371 Parkinson's disease patients. *Parkinsonism Relat Disord*. 2018;48:68-73.
- 372 8.Gómez-Esteban JC, Zarranz JJ, Lezcano E, et al. Sleep complaints and their relation with drug  
373 treatment in patients suffering from Parkinson's disease. *Mov Disord*. 2006;21(7):983-988.
- 374 9.Bailey GA, Hubbard EK, Fasano A, et al. Sleep disturbance in movement disorders: insights,  
375 treatments and challenges. *J Neurol Neurosurg Psychiatry*. 2021;92(7):723-736.
- 376 10.Shafazand S, Wallace DM, Arheart KL, et al. Insomnia, Sleep Quality, and Quality of Life in Mild

377 to Moderate Parkinson's Disease. *Ann Am Thorac Soc*. 2017;14(3):412-419.

378 11.Tsuru A, Matsui K, Kimura A, et al. Sleep disturbance and health-related quality of life in  
379 Parkinson's disease: A clear correlation between health-related quality of life and subjective sleep  
380 quality. *Parkinsonism Relat Disord*. 2022;98:86-91.

381 12.Liu CF, Wang T, Zhan SQ, et al. Management Recommendations on Sleep Disturbance of Patients  
382 with Parkinson's Disease. *Chin Med J (Engl)*. 2018;131(24):2976-2985.

383 13.Videnovic A. Management of sleep disorders in Parkinson's disease and multiple system atrophy.  
384 *Mov Disord*. 2017;32(5):659-668.

385 14.Cheng FK. The use of acupuncture in patients with Parkinson's disease. *Geriatr Nurs*.  
386 2017;38(4):302-314.

387 15.Kluger BM, Rakowski D, Christian M, et al. Randomized, Controlled Trial of Acupuncture for  
388 Fatigue in Parkinson's Disease. *Mov Disord*. 2016;31(7):1027-1032.

389 16.Zeng BY, Zhao K. Effect of Acupuncture on the Motor and Nonmotor Symptoms in Parkinson's  
390 Disease--A Review of Clinical Studies. *CNS Neurosci Ther*. 2016;22(5):333-341.

391 17.Hsu WT, Hsu CM, Hung SC, Hung SY. Acupuncture Improves Sleep Disorders and Depression  
392 among Patients with Parkinson's Disease: A Meta-Analysis. *Healthcare (Basel)*. 2023;11(14).

393 18.Postuma RB, Berg D, Stern M, et al. MDS clinical diagnostic criteria for Parkinson's disease. *Mov*  
394 *Disord*. 2015;30(12):1591-1601.

395

396



397 **Appendix 1**

398 **Informed Consent Form-Information Page**

399 Dear participant:

400 Your doctor has diagnosed you with Parkinson's disease and you are disturbed by sleep problems.

401 You are invited to participate in a study titled "Acupuncture for Parkinson's disease patients with  
402 poor sleep quality: A randomized, controlled trial".

403 Please read the following information as carefully as possible before you decide whether to  
404 participate in this study. It can help you understand why this study is being done, the procedures and  
405 duration of the study, the benefits, the risks you may face, and the discomfort you may experience if  
406 you participate in the study. You can discuss it with your relatives, friends, or ask your doctor for an  
407 explanation to help you make a decision.

408 Study background and objectives

409 Parkinson's disease (PD) is a kind of progressive neurodegenerative disease commonly in people  
410 over 50 years old. With the increase in the percentage of ageing people in the global population, the  
411 incidence of PD is also increasing. The prevalence was 17/100 000 in people over 65 years old in  
412 China. PD patients, experiencing poor sleep quality and quantity, typically come to hospitals with sleep  
413 complaints and more severe motor conditions and negative health-related quality of life. If PD patients  
414 can be diagnosed and treated in a timely manner at an early stage, they can often get better treatment  
415 effects, meet the basic work requirements and obtain better quality of life.

416 Acupuncture, as a traditional Chinese treatment method, has gained global popularity in recent  
417 decades. It can play an important role in reducing adverse reactions to medicine and relieving  
418 non-motor symptoms. Acupuncture is often used to treat sleep disorders and PD. However, there is still  
419 insufficient high-quality clinical evidence to support its effectiveness due to small sample sizes, unclear  
420 reporting and potential bias. Therefore, Therefore, we conducted a randomized clinical trial to evaluate  
421 the efficacy and safety of acupuncture for poor sleep quality among PD patients.

422 This study will be conducted at the Parkinson clinic of **the First Clinical College of Guangzhou**  
423 **University Of Chinese Medicine.**

424 **If you agree to take part in the study, you will need to do the following:**

425 Before you are enrolled in the study, you will undergo some examinations to determine whether  
426 you can participate in the study. The doctor will ask about your medical history. A general physical  
427 examination will be conducted as well.

428 If you meet the inclusion criteria, you will be assigned to the acupuncture group or the control  
429 group for treatment according to the randomization. Patients in the study have a 50% chance of being  
430 assigned to either group. If you enroll this clinical experiment, please maintain your initial dose of  
431 anti-Parkinson medication.

#### 432 **Interventions in two groups**

433 Real acupuncture group: maintain initial dose of anti-Parkinson medication for the treatment of  
434 PD, acupuncture treatment will be performed: three times per week from week 1 to 4. Patients need be  
435 assessed at week0, week 4, week 8.

436 Sham acupuncture group: maintain initial dose of anti-Parkinson medication for the treatment of  
437 PD, sham acupuncture treatment will be performed: three times per week from week 1 to 4. Patients  
438 need be assessed at week0, week 4, week 8.

#### 439 **Possible benefits of participating in the study**

440 You and society probably benefit from this research. Your condition and quality of life may  
441 improve. This study may have a good guiding effect on clinical treatment. However, it is not excluded  
442 that this trial may not improve your condition.

#### 443 **Possible discomfort and inconvenience of participating in the study**

444 If you experience any discomfort during the study period, changes in your condition, or any  
445 unexpected circumstances, whether it related to treatment or not, you should inform your doctor  
446 immediately. The doctor will make a judgment and initiate medical treatment as needed. During  
447 acupuncture clinical trials, some adverse events may occur, such as fainting, local ecchymoses,  
448 continuous pain, acupoint location infection and dizziness and so on. When fainting occurs, the needle  
449 will be removed immediately. The participant will be asked to lie flat with his/her head slightly lower  
450 than their body. The participant will be given warm boiled water or sugar water. In general, the  
451 participants will recover after lying for a while.

452 During the study period, you need to come to our clinic on time for treatment and follow-up, and

453 do some physical tests. These may cause trouble or inconvenience to you.

454 **Personal information confidential**

455 Your medical records (CRF, physical and chemical examination reports, etc.) will be kept in the  
456 hospital. Researchers, sponsor representatives, and ethics committees will be allowed access to your  
457 medical records. Any public report on this study will not disclose your personal identity. We will make  
458 every effort to protect the privacy of your personal medical data within the scope permitted by law.

459 **Voluntary principle**

460 You are voluntarily choose to participate in the study or drop out of the study. Participation in the  
461 study depends entirely on your willingness. You may refuse to participate in the study or withdraw  
462 from the study at any time during the study without affecting your relationship with your doctor, loss of  
463 your medical treatment or other benefits.

464 Your doctor or researcher may discontinue your participation in this study at any time for your  
465 best interest.

466 If you withdraw from the study for any reason, you may be asked about the treatment you are  
467 taking in the study. You may also be asked to perform physical examinations if your doctor thinks it is  
468 needed.

469 If you do not participate in this study, or withdraw from the study, there are many other  
470 alternatives, such as exercise therapy, surgery, and so on. You do not have to choose to participate in  
471 this study in order to treat your illness.

472 If you choose to participate in this study, we hope that you will be able to complete the entire  
473 study process.

474

475

476

477

478 **Informed Consent Form-Signature Page**

479 Clinical study project name: Acupuncture for Parkinson's disease patients with poor sleep quality:

480 A randomized, controlled trial

481 Research unit: the Parkinson clinic of the First Clinical College of Guangzhou University Of  
482 Chinese Medicine, Guangzhou University of Chinese Medicine

483 Approval number : K [2021]104

484 Voluntary Subject Statement:

485 I have read the above introduction to this study and had the opportunity to discuss and ask  
486 questions about this study with my doctor. All my questions were satisfactorily answered.

487 I am aware of the risks and benefits of participating in this study. I understand that participation in  
488 the study is voluntary. I confirm that there is sufficient time to consider this and I understand that:

489 I can always ask my doctor for more information.

490 I can withdraw from the study at any time without being discriminated against or penalised and  
491 my medical rights and treatment will not be affected.

492 I am also aware that if I drop out of the study, especially I drop out of the study due to treatment  
493 reasons, it will be very beneficial to me and the study if I tell the doctor about the change in my  
494 condition and complete the required physical examination.

495 If I need to take any other treatment due to the change in my condition, I will consult my doctor in  
496 advance or inform him/her afterwards.

497 I grant access to my research materials to the ethics committee or the sponsor's representative.

498 I will receive a signed and dated copy of the informed consent. In the end, I agree to participate in  
499 the study and will try to follow my doctor's advice.

500

501 Subject's signature: Date:

502 Subject contact number:

503 Signature of subject's guardian: Date:

504 Guardian's contact number:

505 Subject's guardian is required to sign the informed consent if necessary.

506

507

**Doctor's declaration**

508

I have fully explained this study in detail to the above participant, including his/her rights and possible benefits and risks, and I have answered all his/her questions. To the best of my knowledge, the participant has been informed adequately and has consented to the trial.

511

512

Doctor's signature:

Date:

513

514

Doctor contact number:

515

516

In the event of inconsistency or discrepancy between the Chinese version and the English version, the Chinese language version shall prevail.

517
