# Supplementary material for: Acupuncture and Sleep Quality Among Patients With Parkinson Disease: A Randomized Clinical Trial
Source: PubMed Central journal article supplement (PMC11208974; doi:10.1001/jamanetworkopen.2024.17862), 2024-06-26
Supplement: jamanetwopen-e2417862-s002.pdf [file jamanetwopen-e2417862-s002.pdf]

## Supplementary Online Content

Yan M, Fan J, Liu X, et al. Efficacy of acupuncture for patients with Parkinson disease who have poor sleep quality: a randomized clinical trial. *JAMA Netw Open*. 2024;7(6):e2417862. doi:10.1001/jamanetworkopen.2024.17862

**eFigure 1.** Schematic Diagram of the Auxiliary Acupuncture Device

**eFigure 2.** Auxiliary Acupuncture Device

**eFigure 3.** Acupoint Locations

**eFigure 4.** Therapeutic Effects of Acupuncture

**eTable 1.** Procedure Diagram

**eTable 2.** Blinding Assessment

**eTable 3.** Primary and Secondary Outcomes

**eTable 4.** Acupuncture-Related Adverse Events

This supplementary material has been provided by the authors to give readers additional information about their work.

**eFigure 1.** Schematic Diagram of the Auxiliary Acupuncture Device

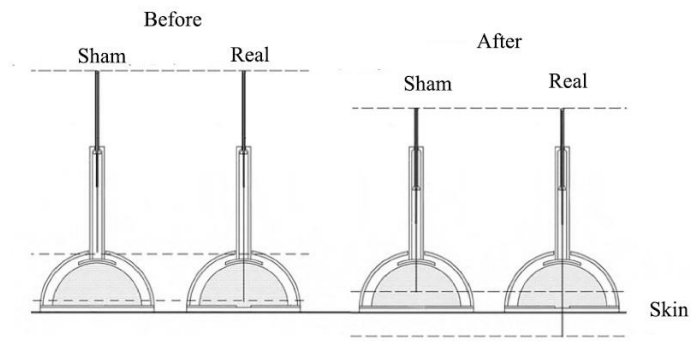

**eFigure 2.** Auxiliary Acupuncture Device

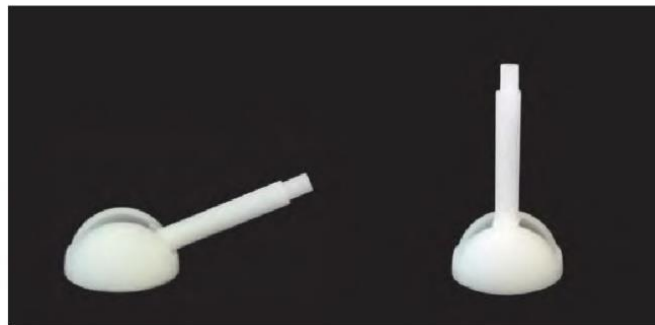

**eFigure 3. Acupoint Locations**

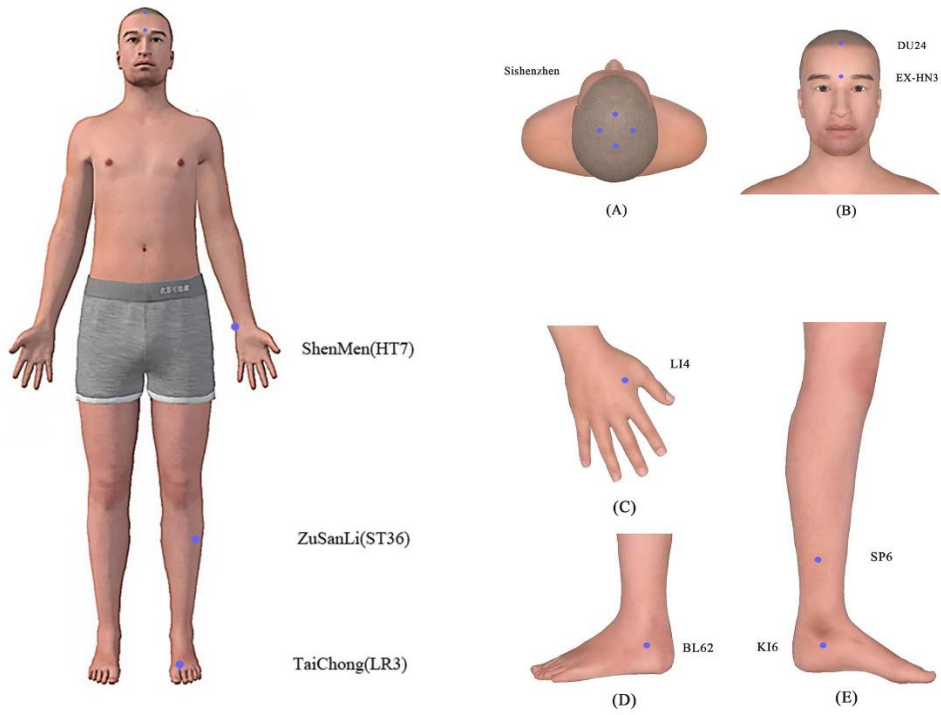

**eFigure 4. Therapeutic Effects of Acupuncture**

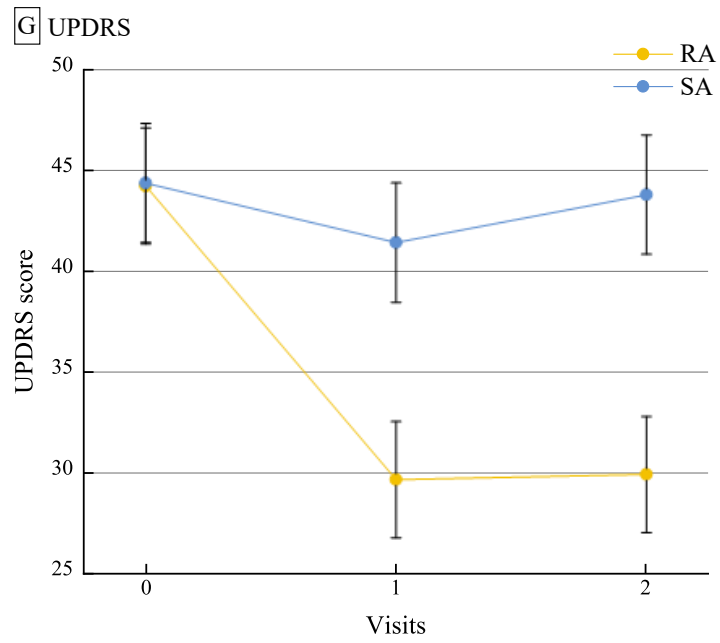

G, improvement in UPDRS score

**eTable 1. Procedure Diagram**

| Study period          |                                  | Intervention period |        | Follow-up period |
|-----------------------|----------------------------------|---------------------|--------|------------------|
| Time point            |                                  | week 0              | Week 4 | Week8            |
| Eligibility screening |                                  | ×                   |        |                  |
| Informed consent      |                                  | ×                   |        |                  |
| Randomization         |                                  | ×                   |        |                  |
| Primary outcome       |                                  | PDSS                | ×      | ×                |
| Secondary outcomes    | Assessment of motor symptoms     | UPDRS               | ×      | ×                |
|                       |                                  | UPDRS-III           | ×      | ×                |
|                       |                                  | LED                 | ×      | ×                |
|                       | Assessment of non-motor symptoms | NMSS                | ×      | ×                |
|                       |                                  | ESS                 | ×      | ×                |
|                       |                                  | HAMA                | ×      | ×                |
|                       | Quality of life                  | PDQ-39              | ×      | ×                |
|                       |                                  |                     | ×      | ×                |
| AEs                   |                                  |                     | ×      | ×                |
| Compliance evaluation |                                  |                     | ×      | ×                |

**eTable 2. Blinding Assessment**

| Group                        | Acupuncture (n) | Sham acupuncture (n) | $\kappa$ |
|------------------------------|-----------------|----------------------|----------|
| Real acupuncture group(n=40) | 23              | 17                   | 0.154    |
| Sham acupuncture group(n=38) | 16              | 22                   |          |

Note: Cohen's kappa of the Auxiliary Acupuncture Device

**eTable 3. Primary and Secondary Outcomes**

| Domin              |                                                                                           | Significance                                                                                                                                    |
|--------------------|-------------------------------------------------------------------------------------------|-------------------------------------------------------------------------------------------------------------------------------------------------|
| Primary outcome    |                                                                                           | PDSS<br>nocturnal sleep quality, scores range from 0 to 150, with higher scores indicating better sleep quality and less sleep disorders.       |
| Secondary outcomes | Assessment of motor symptoms                                                              | UPDRS<br>Overall assessment, scores range from 0 to 192, with higher scores indicating more severe overall symptoms of Parkinson's disease      |
|                    |                                                                                           | UPDRS-III<br>Motor status, scores range from 0 to 56, with higher scores indicating more severe motor symptoms of Parkinson's disease           |
|                    |                                                                                           | LED<br>Levodopa equivalent dose conversion                                                                                                      |
|                    | Assessment of non-motor symptoms                                                          | NMSS<br>Overall NMS assessment, scores range from 0 to 120, with higher scores indicating more severe non-motor symptoms of Parkinson's disease |
|                    |                                                                                           | ESS<br>Daytime sleepiness level, Scores range from 0 to 24, with higher scores indicating more serious sleepiness.                              |
|                    |                                                                                           | HAMA<br>Anxiety state, a Scores range from 0 to 56, with higher scores indicating more serious anxiety                                          |
| Quality of life    | PDQ-39<br>Scores range from 0 to 156, with higher scores indicating worse quality of life |                                                                                                                                                 |

**eTable 4. Acupuncture-Related Adverse Events**

| Adverse Event                       | RA (n=40)         |          | SA(n=38)          |          |
|-------------------------------------|-------------------|----------|-------------------|----------|
|                                     | Participants,n(%) | Events,n | Participants,n(%) | Events,n |
| Needle left in participant          | 0                 | 0        | 0                 | 0        |
| Nausea                              | 1(2.5)            | 1        | 0                 | 0        |
| Fainted                             | 0(0)              | 0        | 0                 | 0        |
| Severe sharp pain                   | 4(10)             | 6        | 1(2.6)            | 0        |
| Sharp pain lasting >10min           | 1(2.5)            | 3        | 0                 | 0        |
| Hematoma                            | 3(7.5)            | 5        | 0                 | 0        |
| Bleeding/numbness/infection         | 5(12.5)           | 5        | 0                 | 0        |
| Severe tremor during treatment      | 7(17.5)           | 7        | 9(23.7)           | 9        |
| allergy                             | 2(5)              | 2        | 1(2.6)            | 0        |
| Other discomforts after acupuncture | 3(7.5)            | 3        | 1(2.6)            | 1        |
