# Supplementary material for: Acupuncture and Sleep Quality Among Patients With Parkinson Disease: A Randomized Clinical Trial
Source: PubMed Central journal article supplement (PMC11208974; doi:10.1001/jamanetworkopen.2024.17862), 2024-06-26
Supplement: jamanetwopen-e2417862-s003.pdf [file jamanetwopen-e2417862-s003.pdf]

## Data Sharing Statement

Yan. Acupuncture and Sleep Quality Among Patients With Parkinson Disease. *JAMA Netw Open*. Published June 26, 2024. doi:10.1001/jamanetworkopen.2024.17862

### Data

**Data available:** No

### Additional Information

**Explanation for why data not available:** If there is any unavailable data in the article, please get in touch with the corresponding author; information will be provided upon reasonable request.
